# Supplementary material for: Examining the effects of pre-pregnancy weight and gestational weight gain on allergic disease development in offspring: a protocol for a population-based study using health administrative databases in Ontario, Canada
Source: HighWire-hosted journal article supplement (doi:10.1136/bmjpo-2020-000893), 2021-01-01
Supplement: bmjpo-2020-000893supp001_data_supplement.xlsx [file bmjpo-2020-000893supp001_data_supplement.xlsx]

## Sheet: Asthma
Original Algorithm:	Gershon et al, 2009
Uses	ICD-10
Algorithm	Original ICD Code	Disease/Disorder		Mapped ICD Code	Disease/Disorder
≥1 hospitalization and/or ≥2 ambulatory care visits for asthma within two years	J45	Asthma		493	Asthma
	J46	Status asthmaticus

## Sheet: Rhinitis
Original Algorithm:	Hill et al, 2016
Uses	ICD-9
Algorithm	Original ICD Code	Disease/Disorder		Mapped ICD Code	Disease/Disorder
≥2 care visits occurring ≥6 months apart	477	Allergic Rhinitis		J301–J304	Allergic Rhinitis
SENSITIVITY ANALYSIS
Original Algorithm:	Stensballe et al, 2017
Uses	ICD-10
Algorithm	Original ICD/DIN Code	Disease/Disorder		Mapped ICD/DIN Code	Disease/Disorder
≥1 hospital contact for:	J30	Hay Fever and Allergic Rhinitis		477	Allergic Rhinitis
	J30.0	Vasomotor Rhinitis
	J30.1	Allergic Rhinitis due to Pollen
	J30.2	Other Seasonal Allergic Rhinitis
	J30.3	Other Allergic Rhinitis
	J30.4	Allergic Rhinitis, Unspecified
	J31.0	Chronic Rhinitis
OR ≥2 filled prescriptions of:		Inhaled Corticosteroids for Rhinitis			Inhaled Corticosteroids for Rhinitis		Original ATC codes were mapped to Canadian Drug Identification Numbers (DIN) on the last tab
Excluding:	J33	Nasal Polyps		471	Nasal Polyps
	J330	Polyps in Nasal Cavity
	J331	Polyp Related Sinus Degeneration
	J331A	Woakes' Ethmoiditis
	J338	Nasal Polyps, Other
	J338A	Polypus Sinus Sphenoidalis
	J339	Nasal Polyps, Unspecified
	J010-J019	Acute Sinusitis		461	Acute Sinusitis
	J320-J3290	Chronic Sinusitis		473	Chronic Sinusitis
OR ≥2 filled prescriptions of:		Antihistamines for Systemic Use			Antihistamines for Systemic Use		Original ATC codes were mapped to Canadian Drug Identification Numbers (DIN) on the last tab
Excluding:	L29	Pruritus		698	Pruritus and related conditions
	L50	Allergic Urticaria		708	Urticaria
OR ≥1 filled prescriptions of:		Specific Immune Therapy, Allergen Substract Therapy			Specific Immune Therapy, Allergen Substract Therapy		Original ATC codes were mapped to Canadian Drug Identification Numbers (DIN) on the last tab
		Medication for Allergic Conjunctivitis			Medication for Allergic Conjunctivitis		Original ATC codes were mapped to Canadian Drug Identification Numbers (DIN) on the last tab

## Sheet: Atopic Dermatitis
Original Algorithm:	Hill et al, 2016
Uses	ICD-9
Algorithm	Original ICD Code	Disease/Disorder		Mapped ICD Code	Disease/Disorder
≥2 care visits occurring ≥6 months apart	691	Atopic dermatitis and related conditions		L20	Atopic Dermatitis and Related Conditions
SENSITIVITY ANALYSIS
Original Algorithm:	Stensballe et al, 2017
Uses	ICD-10
Algorithm	Original ICD/DIN Code	Disease/Disorder		Mapped ICD/DIN Code	Disease/Disorder
≥1 hospital contact for:	L20	Atopic Dermatitis		691	Atopic dermatitis and related conditions		Removed L308C "Winter Feet" since not in Canadian ICD-10-CA codes
Excluding:				691	Diaper or Napkin Rash		Added this exclusion since L20 doesn't include diaper rash but 691 does
OR ≥1 filled prescriptions of:		Agents for Dermatitis: Tacrolimus, Pimecrolimus			Agents for Dermatitis: Tacrolimus, Pimecrolimus		Original ATC codes were mapped to Canadian Drug Identification Numbers (DIN) on the last tab
Excluding:	Exclusion criteria below
OR ≥2 filled prescriptions of the code within 12 months:		Corticosteroids for Topical Use			Corticosteroids for Topical Use		Original ATC codes were mapped to Canadian Drug Identification Numbers (DIN) on the last tab
If above prescription is:		Corticosteroids, very potent (group IV)			Corticosteroids, very potent (group IV)		Original ATC codes were mapped to Canadian Drug Identification Numbers (DIN) on the last tab
Then also with either (as atopic dermatitis is never treated alone with group IV):		Corticosteroids, weak (group I)			Corticosteroids, weak (group I)		Original ATC codes were mapped to Canadian Drug Identification Numbers (DIN) on the last tab
		Corticosteroids, moderately potent (group II)			Corticosteroids, moderately potent (group II)		Original ATC codes were mapped to Canadian Drug Identification Numbers (DIN) on the last tab
		Corticosteroids, potent (group III)			Corticosteroids, potent (group III)		Original ATC codes were mapped to Canadian Drug Identification Numbers (DIN) on the last tab
Excluding:	Exclusion criteria below
Exclusion Criteria
Exclude those without:	L20	Atopic Dermatitis		691	Atopic dermatitis and related conditions		Removed L308C "Winter Feet" since not in Canadian ICD-10-CA codes
AND with:	L21	Seborrhoeic Dermatitis		690.1	Seborrheic dermatitis
	L22	Diaper Dermatitis		691	Diaper or Napkin Rash
	L23	Allergic Contact Dermatitis		692	Contact dermatitis and other eczema
	L24	Irritant Contact Dermatitis
	L25	Unspecified Contact Dermatitis
	L26	Exfoliative Dermatitis		695.89	Other Specified Erythematous Conditions
	L27	Dermatitis due to Substances Taken Internally		693	Dermatitis due to Substances Taken Internally
	L28	Lichen Simplex Chronicus and Prurigo		698.2, 698.3	Prurigo & Lichenification
	L29	Pruritus		698.0, 698.1, 698.8, 698.9	Pruritus ani, Pruritus of genitalia, Pruritic conditions NEC & Pruritic disorder NOS
	L30	Other Dermatitis		692.9, 705.81, 690.8, 696.5	Dermatitis NOS, Dyshidrosis, Erythmtsquamous derm NEC & Pityriasis NEC & NOS		Removed 'except Winter Feet' L308C "Winter Feet" since not in Canadian ICD-10-CA codes
	L40 – L45	Papulosquamous Disorders		696.0 - 696.4, 696.8, 694.3, 697.0, 697.1, 697.8, 057.8, 709.8	Psoriatic arthropathy, Other psoriasis, Parapsoriasis, Pityriasis rosea, Pityriasis rubra pilaris, Psorias related dis NEC, Impetigo herpetiformis, Lichen planus, Lichen nitidus, Lichen NEC, Viral exanthemata NEC & Skin disorders NEC
	L53	Other Erythematosus Conditions		695.0, 695.89, 695.9	Toxic erythema, Erythematous cond NEC & Erythematous cond NOS
	L55	Sunburn		692.71, 692.76, 692.77	Sunburn, 2nd degree sunburn & 3rd degree sunburn
	L56	Other Acute Skin Changes due to Ultraviolet Radiation		692.72, 692.82, 692.75, 692.79	Acute dermatitis due to solar radiation, Dermatitis due to other radiation, Disseminated superficial actinic porokeratosis (DSAP) & Other dermatitis due to solar radiation
	L80	Vitiligo		709.01	Vitiligo
	L90	Atrophic Disorders of the Skin		701.0, 701.3, 701.8, 701.9, 709.2	Circumscribe scleroderma, Striae atrophicae, Other specified hypertrophic and atrophic conditions of skin, Unspecified hypertrophic and atrophic conditions of skin & Scar conditions and fibrosis of skin
	L93	Lupus Erythematosus		695.4	Lupus Erythematosus
OR ≥1 filled prescription of:		Antipsoriasics			Antipsoriasics		Original ATC codes were mapped to Canadian Drug Identification Numbers (DIN) on the last tab
		Salicylates for Dermatological Use			Salicylates for Dermatological Use		Original ATC codes were mapped to Canadian Drug Identification Numbers (DIN) on the last tab
		Corticosteroids Moderately Potent Other Combinations			Corticosteroids Moderately Potent Other Combinations		Original ATC codes were mapped to Canadian Drug Identification Numbers (DIN) on the last tab
		Corticosteroids Potent Other Combinations			Corticosteroids Potent Other Combinations		Original ATC codes were mapped to Canadian Drug Identification Numbers (DIN) on the last tab
		Corticosteroids (Group IV) Clobetasol			Corticosteroids (Group IV) Clobetasol		Original ATC codes were mapped to Canadian Drug Identification Numbers (DIN) on the last tab
		Clobetasol and Antibiotics			Clobetasol and Antibiotics		Original ATC codes were mapped to Canadian Drug Identification Numbers (DIN) on the last tab
AND with:		Antifungals (implies corticosteroid (group IV) use for vaginal fungal infection)			Antifungals (implies corticosteroid (group IV) use for vaginal fungal infection)		Original ATC codes were mapped to Canadian Drug Identification Numbers (DIN) on the last tab

## Sheet: Anaphylaxis
Original Algorithm:	Walsh et al, 2013
Uses	ICD-9
Algorithm	Original ICD Code	Disease/Disorder		Mapped ICD/CCI Code	Disease/Disorder
In an inpatient or emergency department encounter (i.e. DAD or NACRS) either:	995	Other Anaphylactic Shock		T78.2	Anaphylactic Shock, Unspecified
	999.4	Anaphylactic Shock due to Serum		T80.5	Anaphylactic Shock due to Serum
	995.6	Anaphylactic Shock due to Adverse Food Reaction		T78.0	Anaphylactic Shock due to Adverse Food Reaction		Added this code due to high prevalence food-induced anaphylaxis among young children. First-author of original paper said that they didn't include the code since they were mostly interested in anaphylaxis due to medications, but that the addition of this code was a good approach if food-induced anaphylaxis was important to our study.
				T886	Anaphylactic shock due to adverse effect of correct drug or medicament properly administered
OR in an outpatient encounter (i.e. OHIP) either:	995	Other Anaphylactic Shock		T78.2	Anaphylactic Shock, Unspecified
	999.4	Anaphylactic Shock due to Serum		T80.5	Anaphylactic Shock due to Serum
	995.6	Anaphylactic Shock due to Adverse Food Reaction		T78.0	Anaphylactic Shock due to Adverse Food Reaction		Same comment as above
				T88.6	Anaphylactic shock due to adverse effect of correct drug or medicament properly administered
AND at least one of:	519.11	Bronchospasm		J98.01	Acute Bronchospasm
	786.1	Stridor		R06.1	Stridor
	458.9	Hypotension		I95.9	Hypotension, Unspecified
							The three intervention codes in the original algorithm (epinephrine, injection of diphenhydramine, and CPR) did not have analogous OHIP fee codes. As such, we could not include these in our algorithm.

## Sheet: Mapped DIN from ATC Codes
Mapped using the WHO ATC/DDD Index 2020 (https://www.whocc.no/atc_ddd_index/) and the ICES DRUGLIST excel
Original Name	Original ATC Code	Drug	DIN
For Rhinitis Algorithm
Inhaled Corticosteroids for Rhinitis	R01AD01 – R01AD60	Beclomethasone	00002712 00003697 00234243 00270466 00334243 00359688 00374407 00422053 00545325 00545333 00638617 00768707 00774407 00812951 00828521 00828548 00872318 00872326 00872329 00872334 00872342 00880868 00887188 00887196 00887218 00887226 00887234 00893633 00894443 00895369 00895377 00897353 00899135 00901041 00901342 00903654 00905771 00908320 00908347 00923242 00923935 00969400 00973025 00986445 019…
		Prednisolone + combinations	00030961 00030988 00030989 00036129 00194573 00194980 00358711 66888095 00194875 00030739 00030740 00030759 00030767 00031062 00386847 00696617 00770759 00828912 00828920 00903205 00903213 00903531 01934325 01934333 01934341 02245400 02245406 02245407 02245408 00895962 00194867 00806935 00030791 00030643 00030651 00030678 00036137 01962736 01962744 01962752 01962760 02063697 02063700 02063719 020…
		Dexamethasone + combinations	00229652 00778907 00016217 00379689 00778915 02252716 00000698 00016462 00016470 00022500 00022519 00042560 00042579 00269026 00285471 00295094 00349100 00354309 00489158 00501050 00501069 00501131 00504416 00525286 00724149 00732885 00732893 00739839 00903062 00904217 01908839 01930966 01946897 01964068 01964070 01964968 01964976 02016575 02237044 02237045 02237046 02239534 02240684 02240685 022…
		Flunisolide	00421456 00588997 00790486 00878790 01927187 02162687 02230306 02239288 02240956
		Budesonide	00634530 00634549 00636460 00814091 00817228 00851752 00851760 00852074 00904059 00911730 00969112 00999717 01974432 01978918 01978926 02035324 02052431 02229099 02229293 02230648 02231922 02231923 02241003 02241031 02455889 02465949 02465957 02483874 09857675 09857676 09857677 09857679 09857680 09857681 09857682 09991294 49636460 49851752
		Betamethasone	00012173 00012211 00028185 00726486 00779822 00804541 00907820 00907839 00990333 00999157 01925350 01944436 01944444 02048116 02048124 02060868 99100868 00274410 00335347 00351431 00887366 00908568 00323071 00344923 00417246 00629367 00688622 00769614 00804991 00805009 00808187 00809187 00811769 00849650 00849669 00862975 00886688 00887390 00887404 00895679 00895768 00899291 00899305 00899313 008…
		tixocortol + combinations	00609110 x
		Fluticasone	02446561 02446588 02048043 02089912 02090015 02174693 02174707 02174715 02174723 02174731 02174738 02174758 02174766 02174774 02213581 02213583 02213591 02213605 02213613 02213621 02213648 02213656 02213664 02213672 02213680 02213699 02237244 02237245 02237246 02237247 02241752 02243646 02244291 02244292 02244293 02248307 02294745 02296071 02298589 02336405 02453738 02460513 02467895 02467909 024…
		Mometasone	00800902 00813648 00851736 00851744 00871095 02238465 02243021 02243022 02243595 02243596 02244767 02244768 02244769 02248130 02264749 02266385 02270862 02367157 02403587 02405601 02438690 02449811 02455870 02475863 09857431 49871095 90851744
		Triamcinolone	 00014893 00015016 00015024 00029475 02194082 02194090 02194139 00502022 00014613 00014621 00014648 00029106 00029114 00029130 00029270 00029300 00029505 00029564 00029572 00074250 00127914 00192546 00192627 00282448 00282456 00282464 00385182 00385204 00405590 00460761 00464600 00464619 00472557 00472565 00472573 00472581 00488976 00488984 00494240 00501034 00501042 00502928 00509663 00509671 0…
		fluticasone furoate + combinations	02432889 02446561 02446588 02474522 02408872 02444186 02048043 02089912 02090015 02174693 02174707 02174715 02174723 02174731 02174738 02174758 02174766 02174774 02213581 02213583 02213591 02213605 02213613 02213621 02213648 02213656 02213664 02213672 02213680 02213699 02237244 02237245 02237246 02237247 02241752 02243646 02244291 02244292 02244293 02248307 02294745 02296071 02298589 02336405 024…
		ciclesonide	None found.
		hydrocortisone, combinations	02242485 00068772 00068780 00243124 00243132 00520322 00666246 00701904 00091820 00662461 00086096 00426350 00568074 00806099 00900737 01937979 00578533 00578541 00856711 00768069 00155977 00156175 00163511 00163538 00438669 00704555 00704563 00750670 00763543 00837350 01980572 01980580 02240035 00074489 00074497 00074500 00074527 00193410 00193429 00245399 00338605 00774489 00807079 00807087 008…
Antihistamines for Systemic Use	R06A	Bromazine	None found.
		Diphenhydramine + combinations	02246449 02246450 02358689 02289407 00022756 00022757 00022764 00022918 00023191 00023205 00130974 00155276 00271411 00304387 00337404 00337412 00370517 00421197 00439118 00443441 00450839 00479764 00487791 00489867 00504653 00509345 00554294 00556726 00583332 00596612 00610755 00622796 00622818 00728152 00728160 00728162 00754889 00757683 00757691 00792705 00804193 00804401 00811432 00833266 008…
		Clemastine + combinations	00035971 00349046 00458570 01925946 00728500 01906577
		Chlorphenoxamine + combinations	00006491 x
		Diphenylpyraline + combinations	00492744 00524980 00230200 00425125 00462055 00462071 00412651 00242977 00425133 00425141 00467073 00133264 00449024 00449032 00462063 00462039 00462047 00522058 00091626 00091634 00091642 00425168 00214027 00425117 01940783 00763527 00091847 00145815 00581771 00299596 00299561 00299588 02422964 02437953 00145963 00213543 00218227
		Carbinoxamine	None found.
		Doxylamine + combinations	00134155 00545449 00550477 00749052 02048183 02230769 02244662 02485443 00507407 00713465 01946994 00435619 00134104 00460850 00373850 00481394 00609129 00806331 02304503 02406187 02413248 02383365 00566829 02047667 02409542 02410737 01982532 01996215 02198924 02248371 02272792 02291339 02293927 02374277 02378655 02380315 02438305 02449188 02492857 02494027 02276879 02291444 02458462 02481928 024…
		Trimethobenzamide	00012769 00013102 00115568
		Brompheniramine + combinations	02241814 02241813 00295450 00295469 02245301 01900559 01934724 02243945 00026395 00026484 00172227 00172235 00172537 01932535 01932543 01932551 01933582 02052482 02229557 00493082 01934716 02244079 00172545 00656828 01934694 02244078 02215314 00172529 00533963 00810711 00933620 01933574 01933620 02243969 02245076 02266466 02266474 02267446 02267454 02315483 02315491 02328658 02468204 00172650 019…
		Dexchlorpheniramine + combinations	00028142 00028207 00176893 00225533 02273330
		Dimetindene	None found.
		Chlorphenamine + combinations	None found.
		Pheniramine	None found.
		Dexbrompheniramine + combinations	00298433 00616869 00411892 00471348 00746304 00808059 00808253 00810577 00905755 02154285
		Talastine	None found.
		Mepyramine	None found.
		Histapyrrodine + combinations	None found.
		Chloropyramine + combinations	None found.
		Tripelennamine	00005703 00074306 00488461 00584096 00623504 00659673 02239338
		Methapyrilene	None found.
		Thonzylamine	None found.
		Alimemazine	None found.
		Promethazine + combinations	00164291 00385948 01937561 02162199 00164267 00385964 01937545 02162180 00209449 00209457 00232920 00236276 00450561 00450588 00518336 00518344 02043459 02043467 02225654 02225662 00164283 00385956 00811211 01937588 02162172 00164186 01927736 00164259 00385972 00811203 01937553 02162164 00025380 00025402 00025046 00025429 00025712 00025739 00164038 00164046 00213896 00236764 00248754 00567434 005…
		Thiethylperazine	00027324 00027367 00027510
		Methdilazine	00003158 00003514
		Hydroxyethylpromethazine + combinations	None found.
		Thiazinam	None found.
		Mequitazine	None found.
		Oxomemazine	None found.
		Isothipendyl	None found.
		Buclizine + combinations	None found.
		Cyclizine + combinations	00068586 00318809 00985562 00318795 00004448 00318817
		Chlorcyclizine	None found.
		Meclizine + combinations	00901069 00024724 00216151 00220442 02368838 22123148 66903076 90220442 00158127 00221850
		Oxatomide	None found.
		Cetirizine	01900978 02315963 02427192 00900986 00980986 01900986 02145782 02145790 02223546 02223554 02231603 02238337 02240265 02240266 02240910 02241912 02241913 02295059 02295067 02315947 02315955 02316609 02318873 02318881 02318903 02344572 02355868 02358352 02363844 02364689 02368064 02375087 02375095 02408732 02427133 02427141 02432722 02450526 02451751 02451778 02453363 02466171 02467577 02486954 024…
		Levocetirizine	None found.
		Bamipine	None found.
		Cyproheptadine	00009989 00010073 00016314 00016454 00757713 02245667 02245668 02332248 09850775 09991029
		Thenalidine + combinations	None found.
		Phenindamine	None found.
		Antazoline	00005436 x
		Triprolidine	00004812 00235768
		Pyrrobutamine + combinations	None found.
		Astemizole	00610070 00610089 02182912 02184656 02239669
		Terfenadine	00590908 00614394 00641774 00786624 00870927 00881694 00893528 00893536 00893552 01905058 01913395 02034433 02034441 02103575 02103621 02103648 02130882 02130890
		Loratadine	00782696 02019973 02237734 02241523 02242957 02243880 02244691 02244692 02251795 02280159 02284669 02366444 02375990 02379481 02390388 02404494 02418959
		Mebhydrolin	None found.
		Deptropine	None found.
		Ketotifen	02172585 02230799 00577308 00600784 02176084 02218305 02221330 02230730 02231679 02231680 02242324 02279223 02400871 02489651 99400864
		Acrivastine	None found.
		Azelastine	None found.
		Tritoqualine	None found.
		Ebastine	None found.
		Pimethixene	None found.
		Epinastine	None found.
		Mizolastine	None found.
		Fexofenadine	02231462 02231463 02237296 02237633 02242818 02242819
		Desloratadine	02243919 02247192 02247193 02298155 02338424 02408740
		Rupatadine	02456451 02456478
		Bilastine	02454130 x
		Quifenadine	None found.
		Sequifenadine	None found.
Specific Immune Therapy, Allergen Substract Therapy	V01A	Allergen extracts and preparations	00006144 00061379 00061387 00061395 00061409 00061441 00099902 00286273 00286281 00499625 00499633 00499641 00499668 00499676 00504572 00514713 00541427 00541435 00541443 00541451 00541478 00583448 00602752 00602760 00602779 00602787 00602795 00602809 00603384 00605263 00605298 00605301 00605328 00614424 00662283 00705300 00800227 00861081 00861111 00861138 00861162 00861170 00861189 00861219 008…
Medication for Allergic Conjunctivitis	S01GX	Cromoglicic acid + combinations	None found.
		Levocabastine	01945130 02020017 02123363 02131625
		Spaglumic acid	None found.
		Nedocromil	00766038 02230543 02229636 02230446 02241407
		Lodoxamide	00893560 x
		Emedastine	02237355 x
		Azelastine	None found.
		Ketotifen	02172585 02230799 00577308 00600784 02176084 02218305 02221330 02230730 02231679 02231680 02242324 02279223 02400871 02489651 99400864
		Olopatadine	02233143 02305054 02358913 02362171 02402823 02403986 02404095 02420171 02422727 02458411 02458551
		Epinastine	None found.
		Alcaftadine	None found.
For dermatitis algorithm
Agents for Dermatitis: Tacrolimus, Pimecrolimus	D11AH	Tacrolimus	00903944 00950645 00950653 00960039 00960632 00960634 02175983 02175991 02176009 02243144 02244148 02244149 02296462 02296470 02296489 02331667 02416816 02416824 02416832 02454068 02456095 02456109 02485877 02485885 02485893 09851984 09852069 09852662 09854786 66123987 66124086 66990973 99108093 99109293
		Pimecrolimus	02247238 x
		Cromoglicic acid	None found.
		Alitretinoin	02240328 02337630 02337649 02477432 02477440
		Dupilumab	02470365 02492504
		Crisaborole	02476991 x
Corticosteroids for Topical Use	D07	Methylprednisolone	00030961 00030988 00030989 00036129 00194573 00194980 00358711 66888095 00030739 00030740 00030759 00030767 00031062 00386847 00696617 00770759 00828912 00828920 00903205 00903213 00903531 01934325 01934333 01934341 02245400 02245406 02245407 02245408 00030791 00030643 00030651 00030678 00036137 01962736 01962744 01962752 01962760 02063697 02063700 02063719 02063727 02230210 02230211 02231893 022…
		Hydrocortisone	00003719 00003727 00006351 00016527 00021083 00021091 00024805 00030910 00030929 00093637 00093645 00133426 00151475 00157880 00177571 00192562 00192570 00192589 00192597 00192600 00193275 00193283 00193291 00193305 00195294 00216895 00216909 00228079 00228087 00230316 00245410 00245429 00265780 00275581 00298301 00298328 00303887 00303895 00338591 00341606 00341614 00461903 00461911 00477680 004…
		Prednisolone	00030961 00030988 00030989 00036129 00194573 00194980 00358711 66888095 00030739 00030740 00030759 00030767 00031062 00386847 00696617 00770759 00828912 00828920 00903205 00903213 00903531 01934325 01934333 01934341 02245400 02245406 02245407 02245408 00030791 00030643 00030651 00030678 00036137 01962736 01962744 01962752 01962760 02063697 02063700 02063719 02063727 02230210 02230211 02231893 022…
		Clobetasone	00456543 00456551 00889938 00889946 00894591 02214415 02214423
		Hydrocortisone butyrate	None found.
		Flumetasone	00005134 00005789
		Fluocortin	None found.
		Fluperolone	None found.
		Fluorometholone	00259454 00432814 00707511 00897469 02238568 00756784
		Fluprednidene	None found.
		Desonide	00210153 00410179 00521248 00521264 00559113 00886793 00887544 00887563 00889555 00889563 02048639 02115514 02115522 02154862 02154870 02229315 02229323 02348489
		Triamcinolone	00014893 00015016 00015024 00029475 02194082 02194090 02194139 00502022 00014613 00014621 00014648 00029106 00029114 00029130 00029270 00029300 00029505 00029564 00029572 00074250 00127914 00192546 00192627 00282448 00282456 00282464 00385182 00385204 00405590 00460761 00464600 00464619 00472557 00472565 00472573 00472581 00488976 00488984 00494240 00501034 00501042 00502928 00509663 00509671 005…
		Alclometasone	02070855 02070871
		Hydrocortisone buteprate	None found.
		Dexamethasone	00000698 00016462 00016470 00022500 00022519 00042560 00042579 00269026 00285471 00295094 00349100 00354309 00489158 00501050 00501069 00501131 00504416 00525286 00724149 00732885 00732893 00739839 00903062 00904217 01908839 01930966 01946897 01964068 01964070 01964968 01964976 02016575 02237044 02237045 02237046 02239534 02240684 02240685 02240687 02250055 02260298 02260301 02261081 02279363 023…
		Clocortolone	None found.
		Betamethasone	00012173 00012211 00028185 00726486 00779822 00804541 00907820 00907839 00990333 00999157 01925350 01944436 01944444 02048116 02048124 02060868 99100868 00028096 02237835 00274410 00335347 00351431 00887366 00908568 00323071 00344923 00417246 00629367 00688622 00769614 00804991 00805009 00808187 00809187 00811769 00849650 00849669 00862975 00886688 00887390 00887404 00895679 00895768 00899291 008…
		Fluclorolone	None found.
		Desoximetasone	00420271 00486450 00752541 00797170 00886653 00908096 00961078 01987526 01987844 01990942 01995065 02221896 02221918 02221926 02221934 02239068 02239069 02241887 66889318
		Fluocinolone acetonide	00030228 00030229 00030230 00030236 00030237 00030238 00030244 00030260 00030392 00030393 00030394 00030406 00030407 00030408 00030414 00030415 00030416 00030422 00030423 00030424 00130228 00189480 00385220 00385239 00424927 00424935 00428094 00464627 00470724 00472654 00472662 00472670 00472689 00488941 00488968 00501018 00501026 00509647 00509655 00530956 00532630 00535281 00535303 00535311 005…
		Fluocortolone	None found.
		Diflucortolone	00527818 00587818 00587826 00587834 00777818 00811017 00811025 00811033 00896012 00896020 00896047 00896055 02070995
		Fludroxycortide	None found.
		Fluocinonide	00036099 00274437 00274445 00274453 00281913 00424943 00589896 00598933 00716863 00728365 00777080 00777102 00816132 00887145 00887668 00894273 00894281 00894613 00894753 00895687 00897698 00897701 00897914 00897922 00903360 00907227 00908274 00908282 00946970 00946972 01929607 02161923 02161966 02161974 02163152 02187655 02187663 02187671 02236996 02236997 02240269 22369960 66887102 66887129 668…
		Budesonide	00634530 00634549 00636460 00814091 00817228 00851752 00851760 00852074 00904059 00911730 00969112 00999717 01974432 01978918 01978926 02035324 02052431 02229099 02229293 02230648 02231922 02231923 02241003 02241031 02455889 02465949 02465957 02483874 09857675 09857676 09857677 09857679 09857680 09857681 09857682 09991294 49636460 49851752
		Diflorasone	00481793 00481807 00889377 00889385 00889407
		Amcinonide	00443824 00559237 00571016 00575046 00591629 00810029 00810037 00888311 00889032 00894621 00894656 02052881 02154838 02170175 02192268 02192276 02192284 02219719 02230956 02237847 02238428 02238755 02240621 02240757 02240782 02242508 02242532 02242542 02243073 02246714 02247096 02247097 02247098 02247852 02248123 02248726 02257416 02370557 66894648
		Halometasone	None found.
		Mometasone	00800902 00813648 00851736 00851744 00871095 02238465 02243021 02243022 02243595 02243596 02244767 02244768 02244769 02248130 02264749 02266385 02270862 02367157 02403587 02405601 02438690 02449811 02455870 02475863 09857431 49871095 90851744
		Methylprednisolone aceponate	None found.
		Beclomethasone	00002712 00003697 00234243 00270466 00334243 00359688 00374407 00422053 00545325 00545333 00638617 00768707 00774407 00812951 00828521 00828548 00872318 00872326 00872329 00872334 00872342 00880868 00887188 00887196 00887218 00887226 00887234 00893633 00894443 00895369 00895377 00897353 00899135 00901041 00901342 00903654 00905771 00908320 00908347 00923242 00923935 00969400 00973025 00986445 019…
		Hydrocortisone aceponate	None found.
		Fluticasone	02446561 02446588 02048043 02089912 02090015 02174693 02174707 02174715 02174723 02174731 02174738 02174758 02174766 02174774 02213581 02213583 02213591 02213605 02213613 02213621 02213648 02213656 02213664 02213672 02213680 02213699 02237244 02237245 02237246 02237247 02241752 02243646 02244291 02244292 02244293 02248307 02294745 02296071 02298589 02336405 02453738 02460513 02467895 02467909 024…
		Prednicarbate	02059754 02227517 02230642
		Difluprednate	02415534 x
		Ulobetasol	None found.
		Clobetasol	02216213 00234408 00359718 00359726 00479012 00878707 00878723 00881678 00887242 00887250 00888397 00910272 00961345 00961361 00961388 00961396 00961418 00964093 00999564 00999843 01910272 01910280 01910299 02024187 02026767 02084465 02084473 02093162 02126192 02213265 02213273 02213281 02230071 02230072 02230073 02232191 02232193 02232195 02232548 02237272 02240267 02240268 02245522 02245523 022…
		Halcinonide	00326941 00403075 00404179 00404187 00774179 00886696 00886726 00888273 00888281 02010283 02010291 02010305 02011921 02200945 66887803 66887811
		Prednisolone and antiseptics	None found.
		Hydrocortisone and antiseptics	00063312 00063313 00449768 00456403 00091448 00215686 00216828 00521205 00521213 00521221 00203378 00534838 00534846 00990313 00216941 00216968 00216976 00801666
		Flumetasone and antiseptics	00074454 00806870 00806889
		Desonide and antiseptics	None found.
		Triamcinolone and antiseptics	00128031 00128058
		Hydrocortisone butyrate and antiseptics	None found.
		Betamethasone and antiseptics	00271012 00575194 00611174 00813087 00417254 00417262 00811521 00811548 00586692 00586706 00614270 00682217 02244999 00177016 00813036 00813052 02244766 02238818 02238819 02247446 02244126 02457393 02319012 02474883 00177017 00232352 00807052
		Fluocinolone acetonide and antiseptics	None found.
		Fluocortolone and antiseptics	None found.
		Diflucortolone and antiseptics	02028719 x
		Hydrocortisone and antibiotics	02238578 00445045 00155977 00429090 00807478 02038242 02224542 02242485 00243124 00243132 00520322 00666246 00701904 00156175 00163511 00163538 00438669 00704555 00704563 00750670 00763543 00837350 01980572 01980580 00476439 00145718 00390748 00390798 00068667 00191282 00243140 00243159 00666211 00694401 00813559 00912828 01912828 02025736 02230386 00194883 00194891 00194913 00194921 00194948 001…
		Methylprednisolone and antibiotics	00195057 00806919 00806927 00252395 00194867 00806935 00194859 00260428 00880787 00194875
		Prednisolone and antibiotics	00813680 00195057 00806919 00806927 00194867 00806935 00194859 00177121 00042617 00042625 00042633 00045632 00177024 00307246 00395145 00630640 00806617 00807788 00807982 00810894 00903124 02023784 02023814 00218812 00281824 00527998 00760056 00808199 00843741 00903477 02133342 00194875
		Triamcinolone and antibiotics	00128066 00128031 00128058 00184659 00184667 00199850 00245259 00245267 00382620 00433527 00464554 00464562 00464589 00492760 00501107 00562173 00562181 00717002 00717029 00774659 00774667 00806846 00806854 00806862 00808083 00808091 00808105 00808113 00808555 00810959 00810975 00811440 00811459 00960101 01999826 01999834 01999842 01999850 00960128 00903365 00960497 66960500 00192627 00128090 001…
		Fluprednidene and antibiotics	None found.
		Fluorometholone and antibiotics	00395153 x
		Dexamethasone and antibiotics	00778907 00778915 00173592 00173606 00228052 01987712 01987720 02224623 02224631 02247920 00626597 00140732 00042668 00042676 00358177 02023806 02023849
		Flumetasone and antibiotics	None found.
		Betamethasone and antibiotics	02474883 x
		Fluocinolone acetonide and antibiotics	00189499 x
		Fludroxycortide and antibiotics	None found.
		Beclometasone and antibiotics	None found.
		Fluocinonide and antibiotics	00492442 00808393 00808407 07090343
		Fluocortolone and antibiotics	None found.
		Clobetasol and antibiotics	None found.
Corticosteroids, very potent (group IV)	D07AD	Clobetasol	02216213 00234408 00359718 00359726 00479012 00878707 00878723 00881678 00887242 00887250 00888397 00910272 00961345 00961361 00961388 00961396 00961418 00964093 00999564 00999843 01910272 01910280 01910299 02024187 02026767 02084465 02084473 02093162 02126192 02213265 02213273 02213281 02230071 02230072 02230073 02232191 02232193 02232195 02232548 02237272 02240267 02240268 02245522 02245523 022…
		Halcinonide	00326941 00403075 00404179 00404187 00774179 00886696 00886726 00888273 00888281 02010283 02010291 02010305 02011921 02200945 66887803 66887811
Corticosteroids, weak (group I)	D07AA	Methylprednisolone	00030961 00030988 00030989 00036129 00194573 00194980 00358711 66888095 00030739 00030740 00030759 00030767 00031062 00386847 00696617 00770759 00828912 00828920 00903205 00903213 00903531 01934325 01934333 01934341 02245400 02245406 02245407 02245408 00030791 00030643 00030651 00030678 00036137 01962736 01962744 01962752 01962760 02063697 02063700 02063719 02063727 02230210 02230211 02231893 022…
		Hydrocortisone	00003719 00003727 00006351 00016527 00021083 00021091 00024805 00030910 00030929 00093637 00093645 00133426 00151475 00157880 00177571 00192562 00192570 00192589 00192597 00192600 00193275 00193283 00193291 00193305 00195294 00216895 00216909 00228079 00228087 00230316 00245410 00245429 00265780 00275581 00298301 00298328 00303887 00303895 00338591 00341606 00341614 00461903 00461911 00477680 004…
		Prednisolone	00030961 00030988 00030989 00036129 00194573 00194980 00358711 66888095 00030739 00030740 00030759 00030767 00031062 00386847 00696617 00770759 00828912 00828920 00903205 00903213 00903531 01934325 01934333 01934341 02245400 02245406 02245407 02245408 00030791 00030643 00030651 00030678 00036137 01962736 01962744 01962752 01962760 02063697 02063700 02063719 02063727 02230210 02230211 02231893 022…
Corticosteroids, moderately potent (group II)	D07AB	Clobetasone	00456543 00456551 00889938 00889946 00894591 02214415 02214423
		Hydrocortisone butyrate	None found.
		Flumetasone	00005134 00005789
		Fluocortin	None found.
		Fluperolone	None found.
		Fluorometholone	00259454 00432814 00707511 00897469 02238568 00756784
		Fluprednidene	None found.
		Desonide	00210153 00410179 00521248 00521264 00559113 00886793 00887544 00887563 00889555 00889563 02048639 02115514 02115522 02154862 02154870 02229315 02229323 02348489
		Triamcinolone	00014893 00015016 00015024 00029475 02194082 02194090 02194139 00502022 00014613 00014621 00014648 00029106 00029114 00029130 00029270 00029300 00029505 00029564 00029572 00074250 00127914 00192546 00192627 00282448 00282456 00282464 00385182 00385204 00405590 00460761 00464600 00464619 00472557 00472565 00472573 00472581 00488976 00488984 00494240 00501034 00501042 00502928 00509663 00509671 005…
		Alclometasone	02070855 02070871
		Hydrocortisone buteprate	None found.
		Dexamethasone	00000698 00016462 00016470 00022500 00022519 00042560 00042579 00269026 00285471 00295094 00349100 00354309 00489158 00501050 00501069 00501131 00504416 00525286 00724149 00732885 00732893 00739839 00903062 00904217 01908839 01930966 01946897 01964068 01964070 01964968 01964976 02016575 02237044 02237045 02237046 02239534 02240684 02240685 02240687 02250055 02260298 02260301 02261081 02279363 023…
		Clocortolone	None found.
Corticosteroids, potent (group III)	D07AC	Betamethasone	00012173 00012211 00028185 00726486 00779822 00804541 00907820 00907839 00990333 00999157 01925350 01944436 01944444 02048116 02048124 02060868 99100868 00274410 00335347 00351431 00887366 00908568 00323071 00344923 00417246 00629367 00688622 00769614 00804991 00805009 00808187 00809187 00811769 00849650 00849669 00862975 00886688 00887390 00887404 00895679 00895768 00899291 00899305 00899313 008…
		Fluclorolone	None found.
		Desoximetasone	00420271 00486450 00752541 00797170 00886653 00908096 00961078 01987526 01987844 01990942 01995065 02221896 02221918 02221926 02221934 02239068 02239069 02241887 66889318
		Fluocinolone acetonide	00030228 00030229 00030230 00030236 00030237 00030238 00030244 00030260 00030392 00030393 00030394 00030406 00030407 00030408 00030414 00030415 00030416 00030422 00030423 00030424 00130228 00189480 00385220 00385239 00424927 00424935 00428094 00464627 00470724 00472654 00472662 00472670 00472689 00488941 00488968 00501018 00501026 00509647 00509655 00530956 00532630 00535281 00535303 00535311 005…
		Fluocortolone	None found.
		Diflucortolone	00527818 00587818 00587826 00587834 00777818 00811017 00811025 00811033 00896012 00896020 00896047 00896055 02070995
		Fludroxycortide	None found.
		Fluocinonide	00036099 00274437 00274445 00274453 00281913 00424943 00589896 00598933 00716863 00728365 00777080 00777102 00816132 00887145 00887668 00894273 00894281 00894613 00894753 00895687 00897698 00897701 00897914 00897922 00903360 00907227 00908274 00908282 00946970 00946972 01929607 02161923 02161966 02161974 02163152 02187655 02187663 02187671 02236996 02236997 02240269 22369960 66887102 66887129 668…
		Budesonide	00634530 00634549 00636460 00814091 00817228 00851752 00851760 00852074 00904059 00911730 00969112 00999717 01974432 01978918 01978926 02035324 02052431 02229099 02229293 02230648 02231922 02231923 02241003 02241031 02455889 02465949 02465957 02483874 09857675 09857676 09857677 09857679 09857680 09857681 09857682 09991294 49636460 49851752
		Diflorasone	00481793 00481807 00889377 00889385 00889407
		Amcinonide	00443824 00559237 00571016 00575046 00591629 00810029 00810037 00888311 00889032 00894621 00894656 02052881 02154838 02170175 02192268 02192276 02192284 02219719 02230956 02237847 02238428 02238755 02240621 02240757 02240782 02242508 02242532 02242542 02243073 02246714 02247096 02247097 02247098 02247852 02248123 02248726 02257416 02370557 66894648
		Halometasone	None found.
		Mometasone	00800902 00813648 00851736 00851744 00871095 02238465 02243021 02243022 02243595 02243596 02244767 02244768 02244769 02248130 02264749 02266385 02270862 02367157 02403587 02405601 02438690 02449811 02455870 02475863 09857431 49871095 90851744
		Methylprednisolone aceponate	None found.
		Beclomethasone	00002712 00003697 00234243 00270466 00334243 00359688 00374407 00422053 00545325 00545333 00638617 00768707 00774407 00812951 00828521 00828548 00872318 00872326 00872329 00872334 00872342 00880868 00887188 00887196 00887218 00887226 00887234 00893633 00894443 00895369 00895377 00897353 00899135 00901041 00901342 00903654 00905771 00908320 00908347 00923242 00923935 00969400 00973025 00986445 019…
		Hydrocortisone aceponate	None found.
		Fluticasone	02446561 02446588 02048043 02089912 02090015 02174693 02174707 02174715 02174723 02174731 02174738 02174758 02174766 02174774 02213581 02213583 02213591 02213605 02213613 02213621 02213648 02213656 02213664 02213672 02213680 02213699 02237244 02237245 02237246 02237247 02241752 02243646 02244291 02244292 02244293 02248307 02294745 02296071 02298589 02336405 02453738 02460513 02467895 02467909 024…
		Prednicarbate	02059754 02227517 02230642
		Difluprednate	02415534 x
		Ulobetasol	None found.
Antipsoriasics	D05	Tars	02241506 00023237 00035815 00085871 00086126 00090948 00208132 00238252 00241075 00245631 00246948 00251372 00276456 00280747 00342769 00343447 00358494 00358495 00423203 00426415 00426423 00509310 00517879 00530492 00539063 00577359 00579963 00621137 00623237 00632295 00632309 00644994 00645001 00710962 00776415 00810363 00811157 00811165 00812978 00860964 00864706 00875279 00894516 00897302 008…
		Dithranol + combinations	None found.
		Trioxysalen	00331171 01966383
		Methoxsalen	00007269 00007285 00252654 00642236 00646236 00646237 00698059 00903424 00960551 01907476 01946374 02406233 09852247 09852905 09991125 22123043 49007269 99100699 99100916 99100917 99100918
		Fumaric acid	None found.
		Calcipotriol	01971633 x
		Calcitriol	02338572 00481815 00481823 00824291 00891738 00891746 02245686 02245687 02399334 02399342 02431637 02431645 02485710 02485729 02495899 02495902
		Tacalcitol	None found.
		Tazarotene	02230784 02230785 02243894 02243895
		Calcipotriol + combinations	None found.
		Methoxsalen	00007269 00007285 00252654 00642236 00646236 00646237 00698059 00903424 00960551 01907476 01946374 02406233 09852247 09852905 09991125 22123043 49007269 99100699 99100916 99100917 99100918
		Bergapten	None found.
		Etretinate	00616400 00616419 66123914
		Acitretin	02070847 02070863 02080863 02466074 02466082 02468840 02468859
		Fumaric acid derivatives + combinations	None found.
Salicylates for Dermatological Use	D02AF	Salicylic acid preparations	00054232 00475238 00505757 00509914 00666106 00666108 00666114 00744263 00744271 00748277 00774232 00775238 00808202 00811306 00813346 02016447 02227274 02231520 02238910 02241695 02243936 02243937 02243938 02245006 02248196 02248197 66903051 80027681 00961043 01931121 02230134 00181757 00208205 00232890 00362204 00444448 00525383 01909118 01981315 02030462 02403846 00266493 00234141 00907308 000…
Corticosteroids Moderately Potent Other Combinations	D07XB	Flumetasone	00005134 00005789
		Triamcinolone	00014893 00015016 00015024 00029475 02194082 02194090 02194139 00502022 00014613 00014621 00014648 00029106 00029114 00029130 00029270 00029300 00029505 00029564 00029572 00074250 00127914 00192546 00192627 00282448 00282456 00282464 00385182 00385204 00405590 00460761 00464600 00464619 00472557 00472565 00472573 00472581 00488976 00488984 00494240 00501034 00501042 00502928 00509663 00509671 005…
		Fluprednidene	None found.
		Fluorometholone	00259454 00432814 00707511 00897469 02238568 00756784
		Dexamethasone	00000698 00016462 00016470 00022500 00022519 00042560 00042579 00269026 00285471 00295094 00349100 00354309 00489158 00501050 00501069 00501131 00504416 00525286 00724149 00732885 00732893 00739839 00903062 00904217 01908839 01930966 01946897 01964068 01964070 01964968 01964976 02016575 02237044 02237045 02237046 02239534 02240684 02240685 02240687 02250055 02260298 02260301 02261081 02279363 023…
Corticosteroids Potent Other Combinations	D07XC	Betamethasone	00012173 00012211 00028185 00726486 00779822 00804541 00907820 00907839 00990333 00999157 01925350 01944436 01944444 02048116 02048124 02060868 99100868 00274410 00335347 00351431 00887366 00908568 00323071 00344923 00417246 00629367 00688622 00769614 00804991 00805009 00808187 00809187 00811769 00849650 00849669 00862975 00886688 00887390 00887404 00895679 00895768 00899291 00899305 00899313 008…
		Desoximetasone	00420271 00486450 00752541 00797170 00886653 00908096 00961078 01987526 01987844 01990942 01995065 02221896 02221918 02221926 02221934 02239068 02239069 02241887 66889318
		Mometasone	00800902 00813648 00851736 00851744 00871095 02238465 02243021 02243022 02243595 02243596 02244767 02244768 02244769 02248130 02264749 02266385 02270862 02367157 02403587 02405601 02438690 02449811 02455870 02475863 09857431 49871095 90851744
		Diflucortolone	00527818 00587818 00587826 00587834 00777818 00811017 00811025 00811033 00896012 00896020 00896047 00896055 02070995
		Fluocortolone	None found.
Corticosteroids (Group IV) Clobetasol	D07AD01	Clobetasol	02216213 00234408 00359718 00359726 00479012 00878707 00878723 00881678 00887242 00887250 00888397 00910272 00961345 00961361 00961388 00961396 00961418 00964093 00999564 00999843 01910272 01910280 01910299 02024187 02026767 02084465 02084473 02093162 02126192 02213265 02213273 02213281 02230071 02230072 02230073 02232191 02232193 02232195 02232548 02237272 02240267 02240268 02245522 02245523 022…
Antifungals (implies corticosteroid (group IV) use for vaginal fungal infection)	D01	Nystatin	00014850 00014974 00029319 00029416 00248169 00248170 00270113 00282219 00779121 00785709 00792667 00894834 00894893 00895210 00898953 00903212 00904479 00984671 02125145 02194198 02194201 02229852 02238544 02433443 09850457 09857764 40079266 49248169 66898929 66907472 66988170 00015067 00029092 00029491 00029556 00270091 00278793 00288195 00288209 00288217 00295973 00382639 00422592 00444383 004…
		Natamycin	None found.
		Hachimycin	None found.
		Pecilocin	None found.
		Mepartricin	None found.
		Pyrrolnitrin	None found.
		Griseofulvin	00012246 00012254 00012262 00028266 00028274 00028282 00513229 00513237 00901061 02100266 02100274 02100282 09991069 99100253
		Clotrimazole	00903037 00903061 00001403 00139035 00325465 00325473 00353833 00420301 00513903 00513904 00513911 00513938 00513946 00516805 00516806 00516813 00516821 00516848 00567388 00576492 00629243 00731307 00731707 00759457 00810045 00810967 00812366 00812374 00812382 00874043 00874051 00874078 00895571 00895598 00896845 00898112 00899046 00899054 00899399 00901412 00903184 00904279 00908045 00908495 020…
		Miconazole	00321035 00321036 00321037 00326968 00387193 00471534 00497797 00504203 00530999 00685917 00771035 00771036 00807605 00807613 00895237 00895628 00900958 00980617 00980625 00990779 01996401 02084295 02084309 02085852 02126249 02126257 02126567 02126605 02134837 02171775 02194368 02219476 02230303 02230304 02230305 02231106 02231533 02239600 02239601 02244005 02245546 66894796 92085852 95003840 950…
		Econazole	00452114 00561002 00895997 02010267 02011948
		Chlormidazole	None found.
		Isoconazole	None found.
		Tiabendazole	None found.
		Tioconazole	00657395 00791725 02095009 02095017 02095025 02171902 02171910 02217406 02218283 02218291 02241700
		Ketoconazole	00967343 00633836 00788813 00903341 02122197 02231061 02237235 02237882 00703974 00803588 02182920 02245662 02292661
		Sulconazole	None found.
		Bifonazole	None found.
		Oxiconazole	02230452 02230453
		Fenticonazole	None found.
		Omoconazole	None found.
		Sertaconazole	None found.
		Fluconazole	00891800 00891819 00891827 00891835 00891900 00901418 02024152 02091216 02091372 02091380 02141442 02236978 02236979 02236980 02237370 02237371 02237372 02241895 02243645 02245292 02245293 02245294 02245643 02245644 02245697 02246108 02246109 02246620 02246942 02247749 02247922 02248443 02248731 02249294 02249308 02249316 02255510 02261472 02271516 02273632 02273640 02273659 02281260 02281279 022…
		Flutrimazole	None found.
		Eberconazole	None found.
		Luliconazole	None found.
		Efinaconazole	02413388 x
		Imidazoles/triazoles in combination with corticosteroids	00611174 00813087 02244766
		Miconazole + combinations	00321035 00321036 00321037 00326968 00387193 00471534 00497797 00504203 00530999 00685917 00771035 00771036 00807605 00807613 00895237 00895628 00900958 00980617 00980625 00990779 01996401 02084295 02084309 02085852 02126249 02126257 02126567 02126605 02134837 02171775 02194368 02219476 02230303 02230304 02230305 02231106 02231533 02239600 02239601 02244005 02245546 66894796 92085852 95003840 950…
		Bifonazole + combinations	None found.
		Bromochlorosalicylanilide	None found.
		Methylrosaniline	None found.
		Tribromometacresol	None found.
		Undecylenic acid + combinations	00240664 00829315 02222736 02239048 02243662 80041595 80041596 80043930 00240656 00030163 00030201 00373443 00373478 00376906 00519898 00595926 00829145 00829153 00829307 00864137 00864145 02021838 02021846 02021862 02021900 02021919 02154552 80041594 00373451 00829285 02021803 00228796 00374598 00484334 00501840 00146013 00522074 00145661 00145831 00213497 00464651
		Polynoxylin	None found.
		2-(4-chlorphenoxy)-ethanol	None found.
		Chlorphenesin	00253065 00253073 02089637 02091496
		Ticlatone	None found.
		Sulbentine	None found.
		Ethyl hydroxybenzoate	None found.
		Haloprogin	00291021 00291048 00800953 01910094 01910108
		Salicylic acid	00187542 00438294 00636347 00685186 00740292 00764361 00766216 00766240 00805300 00807583 00896063 00900796 00967548 00967556 00968978 00990141 00990244 00999036 00999081 01908553 01908561 01914847 01915185 01930575 01939513 01939521 01947451 01947494 01978861 01999540 02015358 02025868 02044412 02044471 02047403 02069725 02074257 02074265 02139073 02139081 02147076 02147114 02156172 02163055 021…
		Selenium sulfide	00243000 00353809 00418293 00443581 00457086 00457094 00483788 00483796 00594601 00709069 00808466 00811181 01950487 01951653 02242871 02245007
		Ciclopirox	00001516 02250535 02349086 02353288 02410346 02413574 00593362 00811688 00836281 00895741 01987569 01989626 02221802 02221810 02247228 02298953 49593362
		Terbinafine	02242735 02254727 02320134 02352818 02353121 02357070 02385279 02299275 09991323 00903384 02031108 02031116 02239893 02240345 02240346 02240807 02242503 02247530 02262177 02262924 02286580 02294273 02297973 02320126 02341190 02343452 02352796 02363836 02372762 02031094 02238703 02239876 02241815 02241816 02248845 02332612
		Amorolfine	None found.
		Dimazole	None found.
		Tolnaftate	00027936 00027960 00028088 00415782 00458163 00549185 00576026 00576034 00576042 00576050 00576057 00596361 00614211 00614238 00658731 00716928 00810584 00810592 01918826 01919245 01942263 01942573 01942581 02029081 02078341 02220733 02226707 02239066 02239497 02240064 02243064 02243663 02244939 02295873 02311801 02319276 02319314 02375397 02378248 02380765 02396785 02401584 02413760 02417715 024…
		Tolciclate + combinations	None found.
		Flucytosine	00990256 66123998 00384895 66128023 66124323
		Naftifine	02011255 02011263
		Butenafine	02231063 02238762 02244312
		Tavaborole	None found.
